# Supplementary material for: Structural exploration of rhodium catalysts and their kinetic studies for efficient parahydrogen-induced polarization by side arm hydrogenation
Source: Royal Society of Chemistry journal article supplement (doi:10.1039/c9ra02580d), 2019-01-01

*Electronic Supplementary Information*

**Structural exploration of rhodium catalysts and their kinetic studies for efficient parahydrogen-induced polarization by side arm hydrogenation**

Marino Itoda,<sup>a</sup> Yuki Naganawa,<sup>\*a,b</sup> Makoto Ito,<sup>a</sup> Hiroshi Nonaka<sup>a</sup> and Shinsuke Sando<sup>\*a,c</sup>

<sup>a</sup>*Department of Chemistry and Biotechnology, Graduate School of Engineering, The University of Tokyo, 7-3-1 Hongo, Bunkyo-ku, Tokyo, 113-8656, Japan.*

<sup>b</sup>*Interdisciplinary Research Center for Catalytic Chemistry, National Institute of Advanced Industrial Science and Technology (AIST), 1-1-1 Higashi, Tsukuba, Ibaraki, 305-8565, Japan.*

<sup>c</sup>*Department of Bioengineering, Graduate School of Engineering, The University of Tokyo, 7-3-1 Hongo, Bunkyo-ku, Tokyo, 113-8656, Japan.*

\*Correspondence to: yuki.naganawa@aist.go.jp, ssando@chembio.t.u-tokyo.ac.jp

## Table of Contents

|                                                                                   |    |
|-----------------------------------------------------------------------------------|----|
| 1. Supporting schemes .....                                                       | S3 |
| Scheme S1. Schematic illustration of ligand screening for vinyl acetate.          |    |
| Scheme S2. Schematic illustration of PHIP experiments in this study.              |    |
| 2. Supporting figure .....                                                        | S4 |
| Fig. S1 Observation of rhodium hydride species of cat <b>1</b> and cat <b>4</b> . |    |
| 3. NMR spectrum .....                                                             | S5 |

## 1. Supporting schemes

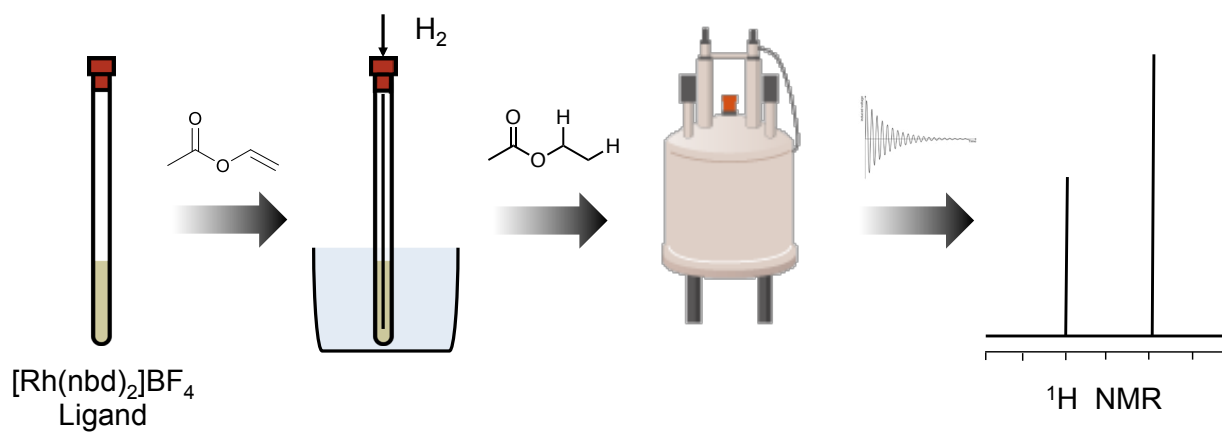

**Scheme S1.** Schematic illustration of ligand screening for hydrogenation of vinyl acetate.

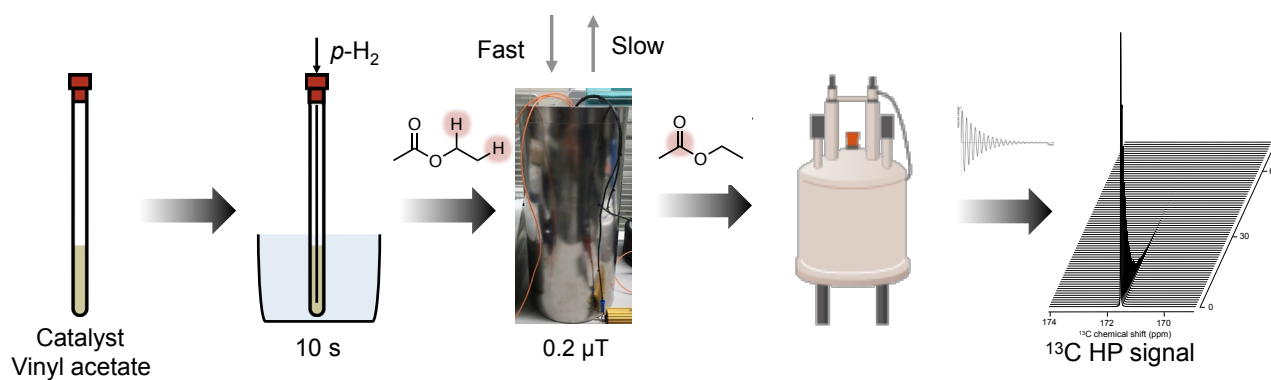

**Scheme S2.** Schematic illustration of PHIP experiments in this study.

## 2. Supporting figure

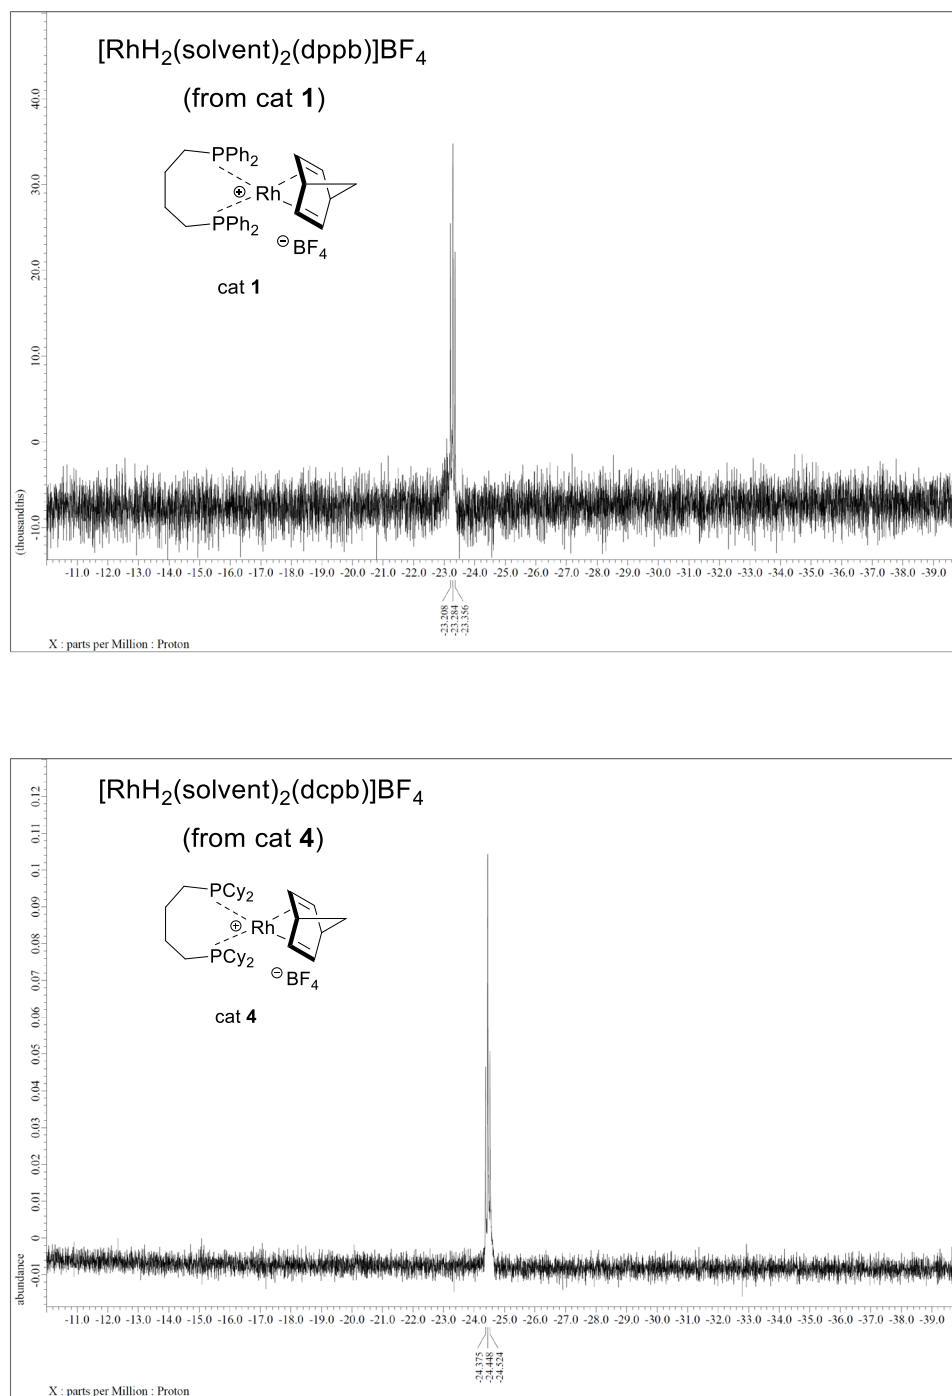

**Fig. S1** Observation of rhodium hydride species in the hydrogenation of cat **1** and **4**. 5 mM of cat **1** or **4** in 700  $\mu$ L of methanol-*d*<sub>4</sub> was set into an NMR tube with a cap. After normal hydrogen bubbling at 24  $^{\circ}$ C under 1 atm for 120 s, <sup>1</sup>H NMR spectrum was measured immediately.

### 3. NMR spectrum ( $^1\text{H}$ and $^{13}\text{C}$ NMR in $\text{CDCl}_3$ )

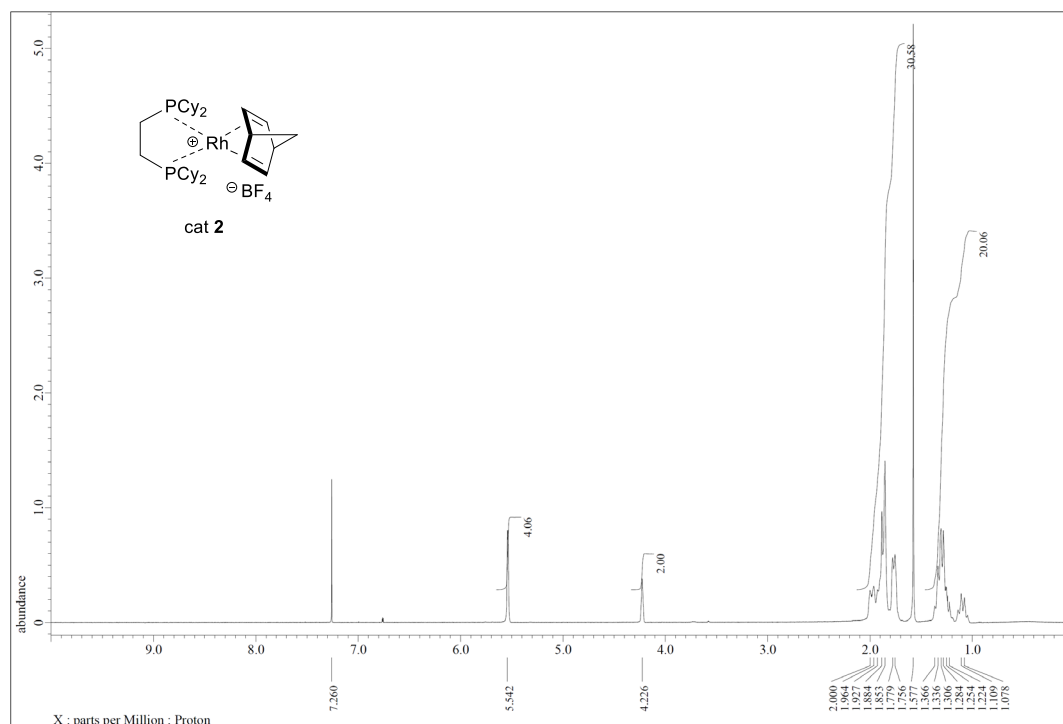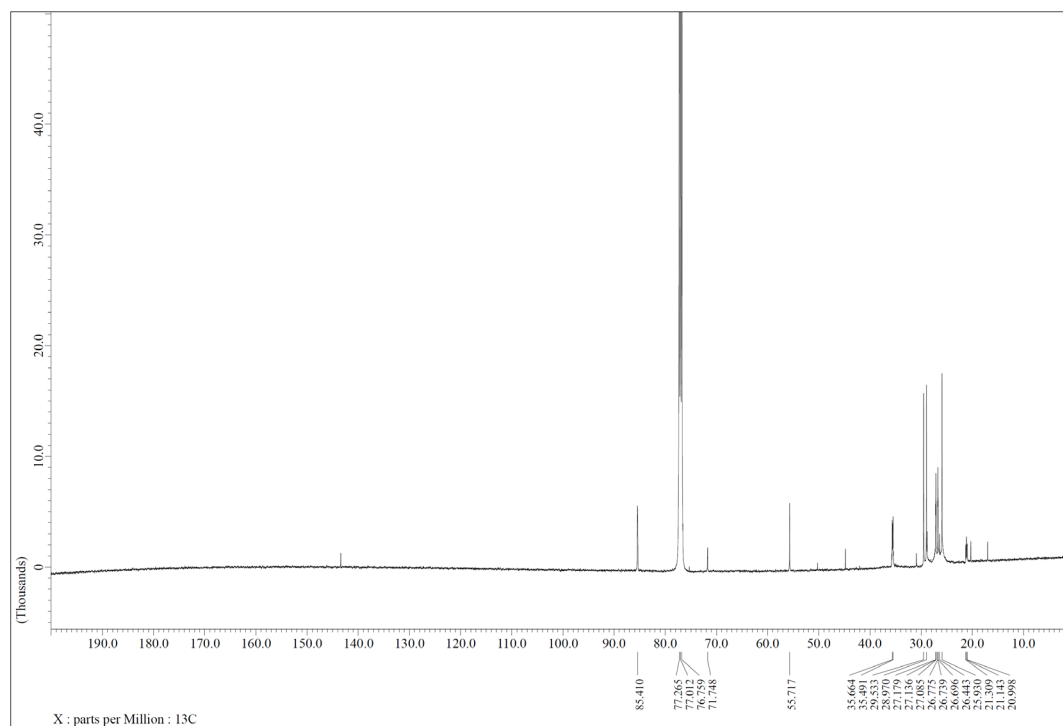

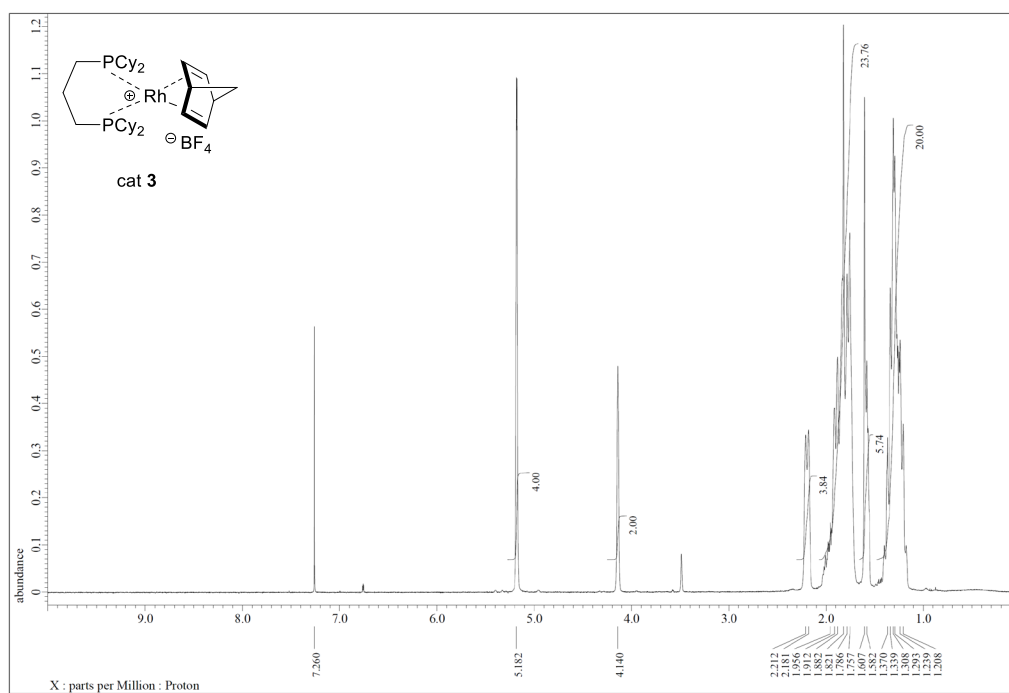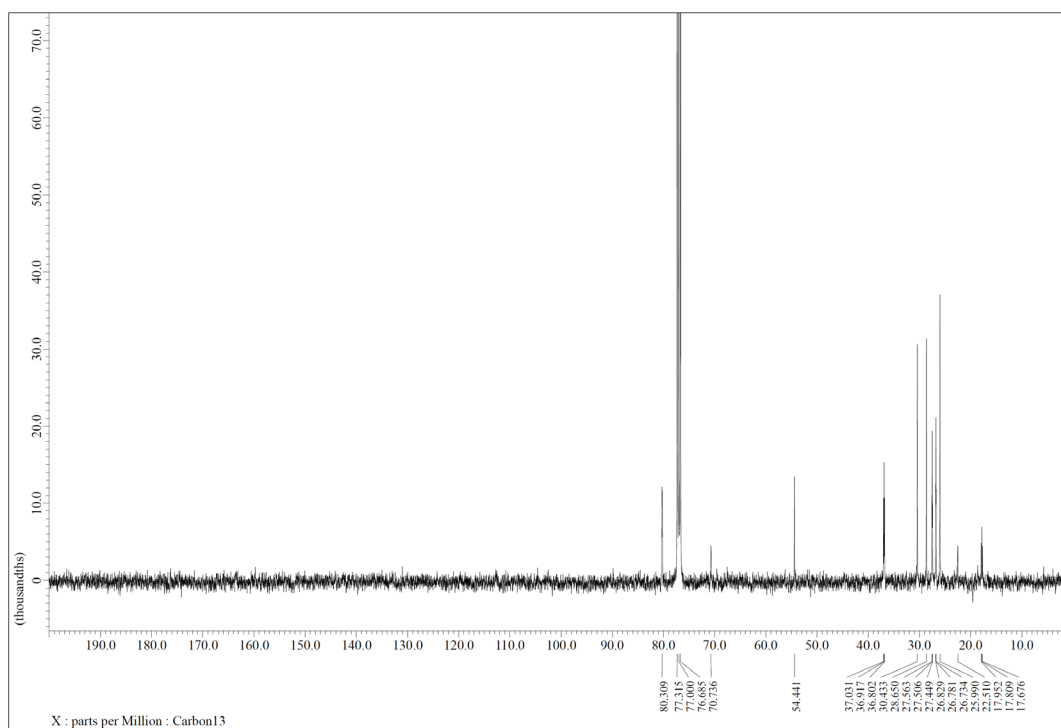

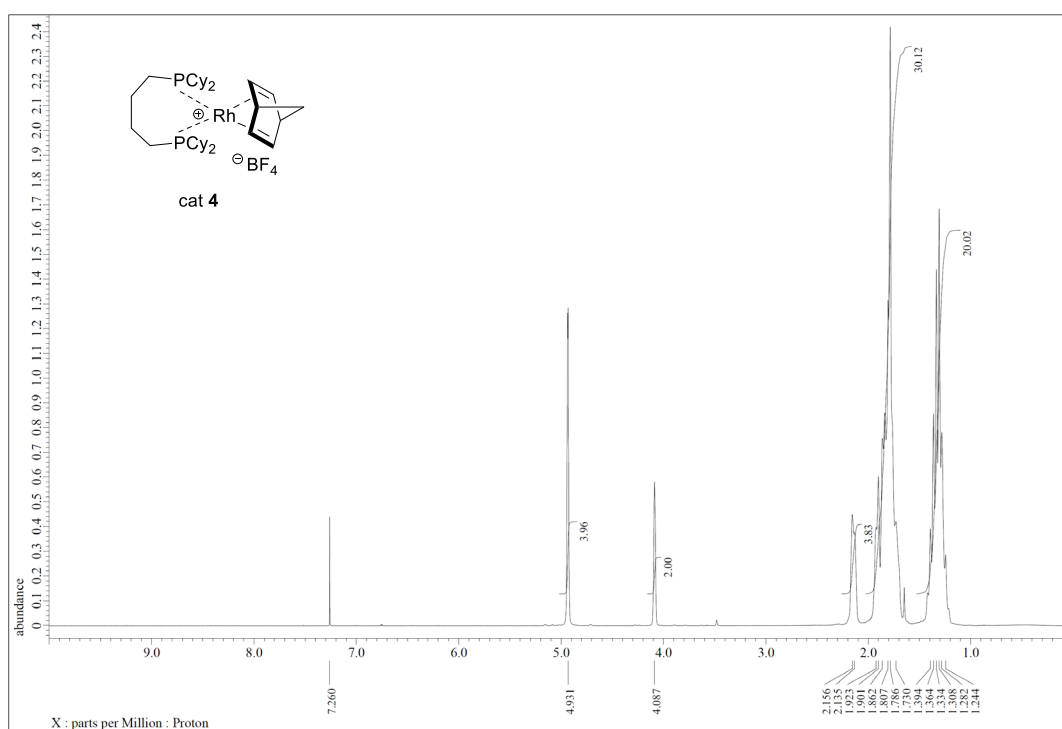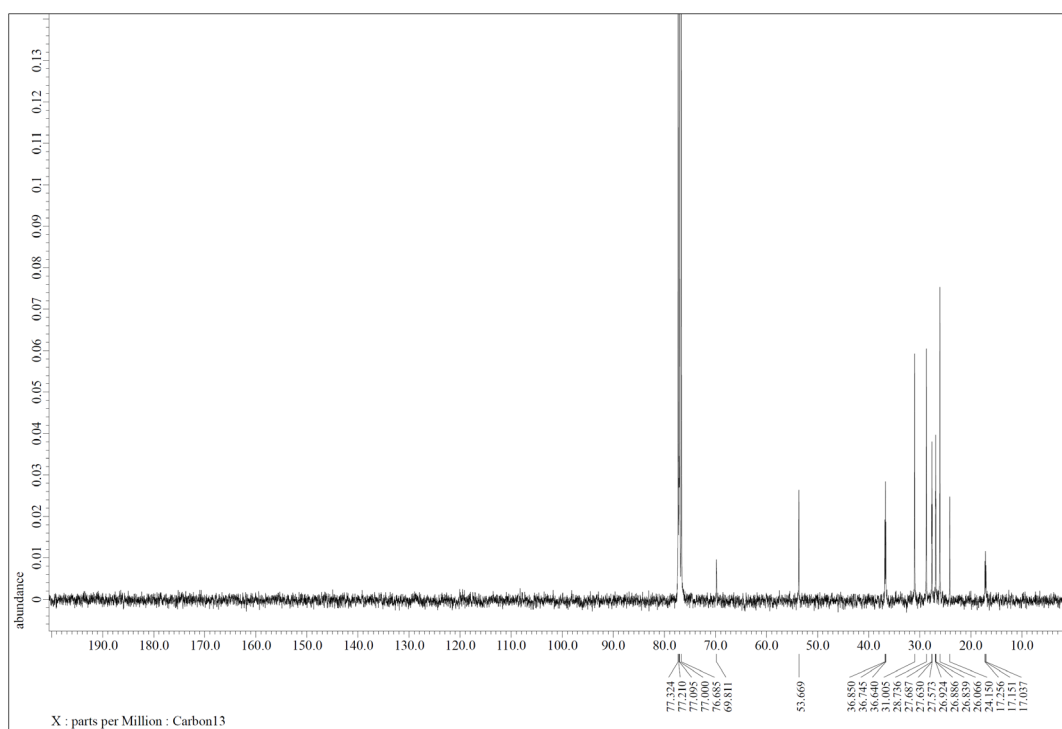

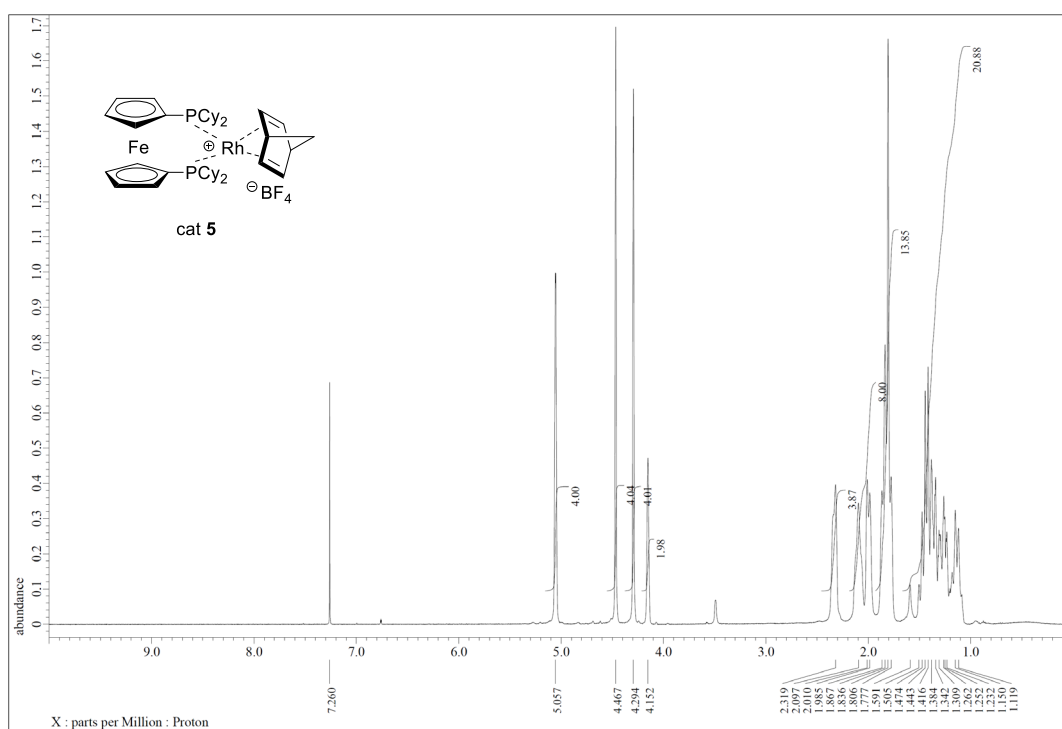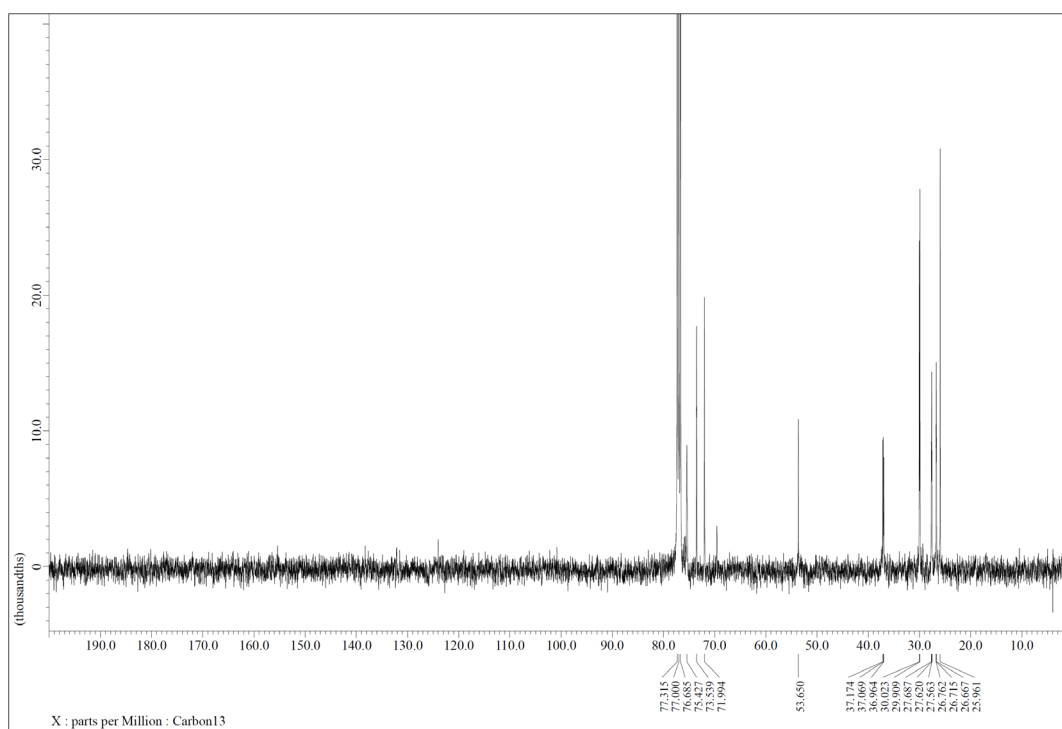

Supplement: c9ra02580d1.pdf [file c9ra02580d1.pdf]
